# Supplementary material for: Association analysis of miRNA-related genetic polymorphisms in miR-143/145 and KRAS with colorectal cancer susceptibility and survival
Source: Oxford University Press journal article supplement (doi:10.1042/bsr20204136), 2021-04-01
Supplement: bsr-2020-4136_supp.pdf [file bsr-2020-4136_supp.pdf]

**Supplementary table Descriptions of selected SNPs of miR-143, miR-145 and Kras**

| SNP          | Gene        | SNP         |                | Region                         |
|--------------|-------------|-------------|----------------|--------------------------------|
|              |             | Location    | Allelic change |                                |
| rs41291957   | mir-143     | 5:148808390 | G/A            | -91bp upstream of pre-mir-143  |
| rs191479100* | mir-143     | 5:148808678 | G/T            | 92bp downstream of pre-mir-143 |
| rs80026971   | mir-145     | 5:148810010 | G/C            | -199bp upstream of pre-mir-145 |
| rs74693964   | mir-145     | 5:148810361 | C/T            | 65bp downstream of pre-mir-145 |
| rs712        | <i>KRAS</i> | 12:25209618 | G/T            | 3'UTR of <i>KRAS</i>           |
| rs1137196    | <i>KRAS</i> | 12:25206035 | C/A            | 3'UTR of <i>KRAS</i>           |

\* Of the 1012 DNA samples, only 3 samples were GT Heterozygous, the others were all GG homozygous, data were not shown in the article.
